# Supplementary material for: In situ cyclodextrin-based homogeneous incorporation of metal (M = Pd, Pt, Ru) nanoparticles into silica with bimodal pore structureElectronic supplementary information (ESI) available: SEM images and isotherm N2 sorption of the cyclodextrin-based homogeneous incorporation of Pd nanoparticles into silica with bimodal pore structure. See http://www.rsc.org/suppdata/cc/b2/b210590j/
Source: Royal Society of Chemistry journal article supplement (doi:10.1039/b210590j), 2002-12-11
Supplement: b210590j.doc [file b210590j.doc]

# **Supplementary data**

### Figure Captions

**Figure 1.** SEM image of the as-prepared ordered three-dimensional polystyrene (PS) colloidal crystal.

**Figure 2.** SEM image of the cyclodextrin-based homogeneous incorporation of Pd nanoparticles into silicawith bimodal pore structure.

**Figure. 3** Isotherm N2 sorption of the cyclodextrin-based homogeneous incorporation of Pd nanoparticles into silicawith bimodal pore structure.

**1 μm**

**Y. Zhou, *et al*., Fig. 1**


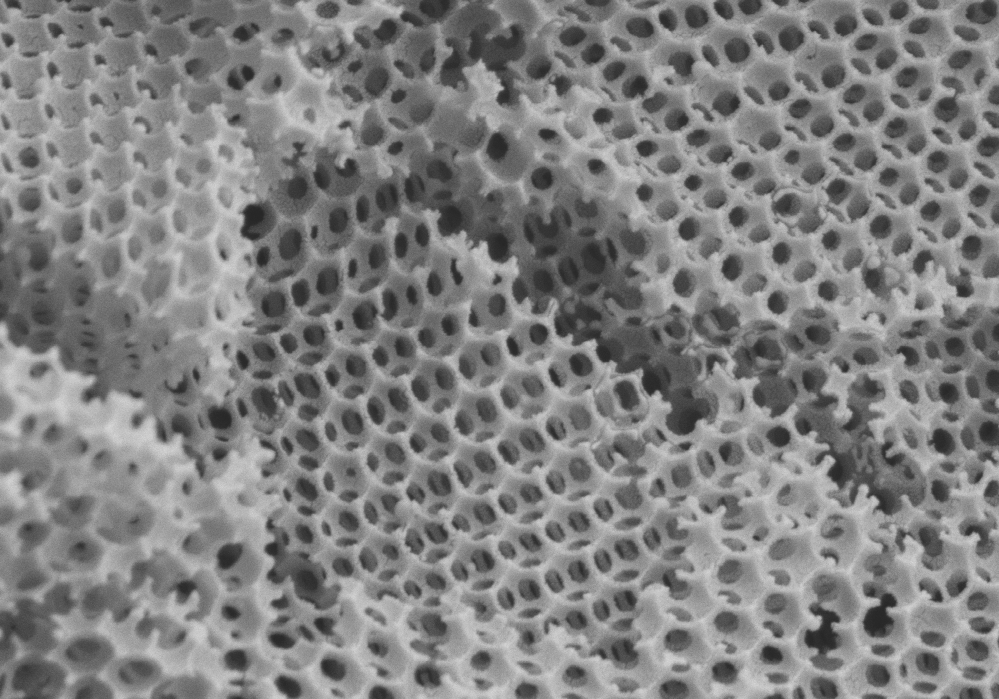


**200 nm**

**Y. Zhou, *et al*., Fig. 2**

**Y. Zhou, *et al*., Fig. 3**
